# Supplementary material
Source: PubMed Central journal article supplement (PMC4494664)
Supplement: NIHMS698079-supplement-01.pdf [file NIHMS698079-supplement-01.pdf]

## TABLES

**eTable 1: Survey of ICU and ID Healthcare Professionals Knowledge, Attitudes and Practices for MDR-GNB Infections and Antimicrobial Susceptibility Testing**

| Domain    | Question                                                                                                                                                                                                                                                                                                                                        | Measure                                                                          |
|-----------|-------------------------------------------------------------------------------------------------------------------------------------------------------------------------------------------------------------------------------------------------------------------------------------------------------------------------------------------------|----------------------------------------------------------------------------------|
| Knowledge | Familiarity with treatment of MDR-GNB: <ul style="list-style-type: none"> <li>Bloodstream infection</li> <li>Hospital-acquired pneumonia</li> <li>Urinary tract infection</li> </ul>                                                                                                                                                            | 4 point scale from <i>Not familiar</i> to <i>extremely familiar</i> <sup>a</sup> |
| Knowledge | Awareness of following for MDR-GNB: <ul style="list-style-type: none"> <li>Resistance mechanisms expressed Standard commercial susceptibility testing methods used at NYP (e.g., Vitek).</li> <li>Specialized susceptibility testing methods used at NYP (e.g., Etest).</li> <li>Definition for <i>Contact Isolation</i> used at NYP</li> </ul> | 3 options: <i>Aware</i> , <i>Not aware</i> , and <i>Not sure</i> <sup>b</sup>    |
| Knowledge | Following statements true or false: <ul style="list-style-type: none"> <li>Standard commercial antimicrobial susceptibility testing for MDR-GNB may be inaccurate.</li> <li>Carbapenem agents are ineffective therapy for GNB expressing extended spectrum <math>\beta</math>-lactamases.</li> </ul>                                            | 3 options: <i>True</i> , <i>False</i> , <i>Not sure</i> <sup>c</sup>             |

- 
- Tigecycline is treatment option for hospital-associated pneumonia caused by MDR-*Pseudomonas aeruginosa*.
  - Carbapenem-resistant *Klebsiella* spp. are usually susceptible to quinolone antibiotics.
  - Quinolone antibiotics exhibit concentration-dependent killing.
- 

|                             |                                                                                                                                                                                                                                                                                                                                                                                                                                                                                                                                                                  |                                                                                                 |
|-----------------------------|------------------------------------------------------------------------------------------------------------------------------------------------------------------------------------------------------------------------------------------------------------------------------------------------------------------------------------------------------------------------------------------------------------------------------------------------------------------------------------------------------------------------------------------------------------------|-------------------------------------------------------------------------------------------------|
| Attitude<br><br>(Agreement) | Agree or disagree with following: <ul style="list-style-type: none"> <li>• Antimicrobial susceptibility testing is useful when caring for patient infected with MDR-GNB</li> <li>• MDR-GNB infections are a serious problem in ICUs in the U.S.</li> <li>• MDR-GNB infections are a serious problem in ICUs at NYP.</li> <li>• Limiting use of broad-spectrum antibiotics in ICUs decreases antimicrobial resistance.</li> <li>• Placing ICU patients colonized/infected with MDR-GNB on <i>Contact Isolation</i> decreases antimicrobial resistance.</li> </ul> | 4 point scale from<br><br><i>Strongly disagree</i> to<br><br><i>Strongly agree</i> <sup>d</sup> |
|-----------------------------|------------------------------------------------------------------------------------------------------------------------------------------------------------------------------------------------------------------------------------------------------------------------------------------------------------------------------------------------------------------------------------------------------------------------------------------------------------------------------------------------------------------------------------------------------------------|-------------------------------------------------------------------------------------------------|

---

|                                 |                                                                                                                                                                                                                                                                          |                                                                                    |
|---------------------------------|--------------------------------------------------------------------------------------------------------------------------------------------------------------------------------------------------------------------------------------------------------------------------|------------------------------------------------------------------------------------|
| Attitude<br><br>(Self-efficacy) | Confident in ability to do the following <ul style="list-style-type: none"> <li>• Use antimicrobial resistance patterns in the ICU to guide empiric antibiotic therapy.</li> <li>• Interpret results of standard commercial susceptibility tests for MDR-GNB.</li> </ul> | 4 point scale from <i>Not confident</i> to <i>Extremely confident</i> <sup>e</sup> |
|---------------------------------|--------------------------------------------------------------------------------------------------------------------------------------------------------------------------------------------------------------------------------------------------------------------------|------------------------------------------------------------------------------------|

---

- 
- Interpret results of specialized susceptibility tests for MDR-GNB.
  - Use literature to determine optimal treatment strategies for MDR-GNB.
- 

|                                         |                                                                                                                                                                                                                                   |                                                                               |
|-----------------------------------------|-----------------------------------------------------------------------------------------------------------------------------------------------------------------------------------------------------------------------------------|-------------------------------------------------------------------------------|
| Attitude<br><br>(Outcome<br>expectancy) | Importance of following in improving outcomes of MDR-GNB infection                                                                                                                                                                | 4 point scale from <i>Not Important</i> to <i>Very Important</i> <sup>f</sup> |
|                                         | <ul style="list-style-type: none"> <li>• Results of susceptibility testing.</li> <li>• Requiring approval for restricted antibiotics.</li> <li>• Infectious disease consults.</li> <li>• Clinical pharmacist consults.</li> </ul> |                                                                               |

---

|                                         |                                                                                                                                                                                                                                                                                                                                                                                                                                                                                                                              |                                                                               |
|-----------------------------------------|------------------------------------------------------------------------------------------------------------------------------------------------------------------------------------------------------------------------------------------------------------------------------------------------------------------------------------------------------------------------------------------------------------------------------------------------------------------------------------------------------------------------------|-------------------------------------------------------------------------------|
| Attitude<br><br>(Outcome<br>expectancy) | Perceptions of importance to guide management:                                                                                                                                                                                                                                                                                                                                                                                                                                                                               | 4 point scale from <i>Not Important</i> to <i>Very Important</i> <sup>f</sup> |
|                                         | <ul style="list-style-type: none"> <li>• Literature searches.</li> <li>• Formal lectures.</li> <li>• Clinical pharmacist consults.</li> <li>• Infectious disease consults.</li> <li>• Educational materials from pharmaceutical industry.</li> <li>• Web-based resources specific to NYP (e.g., local formulary, antibiograms).</li> <li>• Other web-based resources available through NYP (e.g., <i>Up-to-date</i>, Micromedex).</li> <li>• Outside web-based resources (e.g., Johns Hopkins guide, MD consult).</li> </ul> |                                                                               |

---

---

|           |                                                                                                                                                                                                                                                     |                                                                      |
|-----------|-----------------------------------------------------------------------------------------------------------------------------------------------------------------------------------------------------------------------------------------------------|----------------------------------------------------------------------|
| Practices | Practices when treating MDR-GNB infections:                                                                                                                                                                                                         | 4 point scale from <i>Never</i> to <i>Almost always</i> <sup>g</sup> |
|           | <ul style="list-style-type: none"> <li>• Request specialized susceptibility tests.</li> <li>• Modify treatment based on susceptibility tests.</li> <li>• Request infectious disease consults.</li> <li>• Treat with combination therapy.</li> </ul> |                                                                      |

---

Abbreviations in Table: MDR, multidrug-resistant; GNB, gram-negative bacilli; ICU, intensive care unit; ID, infectious diseases; NYP, NewYork-Presbyterian Hospital.

<sup>a</sup> Dichotomized: Not familiar/Somewhat familiar vs. Very/extremely familiar

<sup>b</sup> Dichotomized: Aware vs. Not aware/Not sure

<sup>c</sup> Dichotomized: True vs. False and Not sure

<sup>d</sup> Dichotomized: Strongly disagree and Disagree vs. Agree and Strongly agree

<sup>e</sup> Dichotomized: Not confident and Somewhat confident vs. Very confident and Extremely confident

<sup>f</sup> Dichotomized: Not Important and Minimally Important vs. Moderately Important and Very Important

<sup>g</sup> Dichotomized: Never and Sometimes vs. Often and Almost always
